# Supplementary material for: Where and How Wolves (Canis lupus) Kill Beavers (Castor canadensis)
Source: PLOS journal article supplement (doi:10.1371/journal.pone.0165537), 2016-12-19
Supplement: S1 (10.1371/journal.pone.0165537.s001) [file journal.pone.0165537.s001]

# 1 **S1 Appendix. Individual Descriptions of Kill Sites.**

2 Below are descriptions of 22 beaver kill sites that we documented from April  
3 2015 to November 2015 in Voyageurs National Park, Minnesota. When describing a kill  
4 site we frequently mention the location of beaver remains, or of the collared wolf as  
5 being in the vicinity of the kill site. We considered an object in the vicinity of the kill site  
6 if it was <200 m from the kill site but not at the kill site. We use the term consumption  
7 site to denote the location where a wolf consumed the beaver. In most cases the  
8 consumption occurred at the kill site. However, there were a few instances where  
9 multiple wolves were present and several consumption sites radiated out from the actual  
10 kill site (e.g., Beaver Kill Site #17 and 22). With many of the individual descriptions we  
11 have attempted to infer how the beaver was killed based on evidence at the kill site, and  
12 wolf behavior at other clusters we examined in similar locations where we did not find  
13 kill sites. In some instances there simply was not enough evidence to determine how the  
14 wolf or wolves killed the beaver, and any attempts to describe how the beaver was killed  
15 are purely speculative.

## 16 **Descriptions of Individual Kill Sites**

### 17 **Beaver Kill Site #1 (UTM 501767, 5361064)**

#### 18 **Kill Site Type: Below Dam**

19 On 27 April 2015 we documented a beaver kill site from wolf V009 of the Ash  
20 River Pack. The wolf spent a minimum of 20 hr (4-hr fix interval) in a grassy area  
21 downstream from a beaver dam during which at some point it killed a beaver. There were  
22 many beaver trails going over the dam and 1 went into a small stagnant channel

23 (approximately 1–1.5 m wide) below the dam that connected to an old beaver pond. We  
24 found 4 wolf beds in this cluster within 3 m of each other. Given the amount of time  
25 spent at this cluster, we are unsure if these 4 beds are from a single wolf or multiple  
26 wolves. The beds were 15–20 m from the dam. In 2 of the wolf beds we found tufts of  
27 beaver hair and bone fragments. Beaver hair, dried stomach contents, and beaver bones in  
28 a small trampled area about 10 m from the beds suggested this was where the beaver was  
29 killed and consumed. This site was 15.0 m downstream from the dam. Trampled  
30 vegetation next to the stagnant channel suggested the wolf pulled the beaver out the  
31 channel and then consumed it 10 m away.

## 32 **Beaver Kill Site #2 (UTM 505335, 5361076)**

### 33 **Kill Site Type: Below Dam**

34 On 28 April 2015 we documented a beaver kill site from wolf V009 of the Ash  
35 River Pack. The kill occurred below a large beaver dam. There were well-worn trails and  
36 fresh cuttings on the downstream side of the dam suggesting that beavers used this area  
37 frequently. Although the kill site was close to a well-worn feeding trail that crossed over  
38 the dam, we considered this to be a below dam kill site because it was <10 m from a large  
39 dam. At the kill site we found a large area of depressed vegetation with small tufts of  
40 beaver fur, a few dried pieces of stomach contents, and a few bone fragments. The wolf  
41 appeared to have been alone and spent a minimum of 8 hr (4-hr fix interval) at this kill  
42 site. We postulate that the beaver crossed over the dam unaware of a wolf waiting below  
43 the dam, and once on the downslope of the dam was attacked immediately.

## 44 **Beaver Kill Site #3 (UTM 505477, 5363871)**

### 45 **Kill Site Type: Near Shore**

46           On 30 April 2015, we documented a kill site from wolf V009 of the Ash River  
47 Pack 27.2 m from the shoreline at the south end of Mud Bay, Lake Kabetogama. The kill  
48 site was easily identified as there were large amounts of beaver fur present as well as a  
49 large area of matted vegetation. A wolf scat was also present at the kill site. The wolf was  
50 probably alone at this kill and stayed there a minimum of 12 hr (4-hr fix interval).

51           The kill site was in a large open grassy area with the nearest woody vegetation  
52 approximately 50 m further inland. There were no beaver trails nearby and there was no  
53 evidence of fresh cuttings in the vicinity. The beaver was likely associated with an active  
54 lodge that was about 100 m away. We are uncertain how the beaver got from the water to  
55 the kill site.

#### 56 **Beaver Kill Site #4 (UTM 505642, 5363788)**

##### 57 **Kill Site Type: Near Shore**

58           We documented Beaver Kill Site #4 on 30 April 2015 100 m from Beaver Kill  
59 Site #3. This kill site was found opportunistically and based on GPS-location data wolf  
60 V009 was not near this site on the date this kill occurred. Thus, the kill was made by  
61 another wolf in the Ash River pack. Beaver Kill Site #4 was undoubtedly a different kill  
62 site as it was 1–2 days old (based on the fresh wolf scat as well as the bright red, fresh  
63 tissue on skull fragments) while Beaver Kill Site #3 was 17 days old (based on GPS-  
64 location data).

65           Without a GPS-collared wolf at the kill site we cannot determine how long the  
66 wolf was present at the kill site but it appears to have been alone. The only remains at the  
67 kill site were skull fragments including the incisors, a piece of the lower mandible, and  
68 the upper molariform teeth. There was depressed vegetation at the site but as was the case

69 with Beaver Kill Site #3, we are uncertain what occurred here. The kill site was 16 m  
70 from a small channel at the end of the bay that had < 0.3 m of water in it. There were no  
71 fresh cuttings or beaver trails nearby, and we are not sure why the beaver was at this area.

## 72 **Beaver Kill Site #5 (UTM 504262, 5363766)**

### 73 **Kill Site Type: At Lodge**

74 On 30 April 2015 we documented a kill site approximately 10 m from a beaver  
75 lodge on the west side of Daly Bay in Lake Kabetogama, VNP. The lodge was situated  
76 on a 10 m wide channel in tall cattails (*Typha* spp.) and canary grass (*Phalaris*  
77 *arundinacea*). The water level was very low and the entire lodge was out of the water.  
78 The channel was mostly dry with some water (about 1.0 m wide by 0.5 m deep)  
79 remaining. To access open water, beavers would have to travel 50–70 m via the channel.

80 Numerous wolf tracks surrounded the lodge. There were also wolf tracks in the  
81 muddy canal entrances to the lodge where a wolf was presumably inspecting the lodge.  
82 Wolf V009 of the Ash River pack appeared to be alone and spent a minimum of 8 hr (4-  
83 hr fix interval) at this kill site. Based on depressed vegetation, it appeared wolf V009  
84 made contact with the beaver 1 m from the lodge and then dragged it back behind the  
85 lodge 10 m where it then consumed the beaver. This kill site was especially obvious  
86 because the dead cattails and canary grass were very brittle and broke easily with contact.

87 The intact beaver skull, tufts of fur, and bone fragments were at the kill site. We  
88 think the wolf waited for the beaver to exit the lodge and then attacked it. We saw no  
89 evidence in the muddy shoreline that the beaver tried to run back into the lodge with the  
90 wolf in pursuit. Therefore, the beaver had to have been leaving the lodge when attacked.

## 91 **Beaver Kill Site #6 (UTM 523575, 5359361)**

92 **Kill Site Type: Near Shore**

93           On 3 May 2015, we documented a kill site on the west shore of Little Johnson  
94 River about 1 km north of Little Johnson Lake. The kill was 16.0 m from water and wolf  
95 V028 of the Moose River pack spent a minimum of 6 hr (6-hr fix interval) in the vicinity  
96 of the kill. The wolf was likely by itself at the kill.

97           Like other on shore kill sites, we do not know what occurred here. The kill site  
98 was in an open grassy area next to the river with no beaver trails or active cuttings  
99 nearby. We found the skull, lower mandible, bone fragments and fur at the kill site. This  
100 beaver was likely associated with an active lodge ~150 m away. The colony had dammed  
101 the Little Johnson River about 50 m upstream of the kill site. There were no drag marks  
102 or depressed vegetation nearby.

103 **Beaver Kill Site #7 (UTM 518406, 5360343)**

104 **Kill Site Type: Feeding Trail**

105           On 5 May 2015, we documented a kill site on the south shore of Moose River  
106 approximately 1.5 km upstream from where Moose River flows into Moose Bay,  
107 Namakan Lake. Wolf V027 spent a minimum of 12 hr (6-hr fix interval) in the vicinity of  
108 this kill site, and was probably alone.

109           The kill site was on a feeding trail by an active beaver lodge situated on Moose  
110 River where beavers were cutting small aspen saplings. The kill occurred 17.7 m from  
111 Moose River. At the kill site we only found beaver fur and stomach contents. We did find  
112 tufts of beaver fur up to 1 m high in the vegetation from when the wolf was handling the  
113 beaver at the kill site.

114 Wolf tracks on exposed muddy shoreline of Moose River provided helpful  
115 information in understanding what occurred at this kill. We located a wolf bed close to an  
116 active beaver lodge on Moose River as well as tracks on the shoreline from the lodge to  
117 the feeding trail (distance from lodge to feeding trail was about 30 m) where the wolf  
118 tracks stopped and turned up the trail. We found tufts of beaver hair every few meters  
119 along the feeding trail until we reached the kill site. We concluded the wolf was waiting  
120 nearby when a beaver left the lodge and went ashore on this feeding trail. The wolf  
121 followed, cut off the beaver's access to water, and killed it. The tufts of fur along the trail  
122 are probably from the wolf dragging or chasing the struggling beaver up the trail.

### 123 **Beaver Kill Site #8 (UTM 504617, 5360090)**

#### 124 **Kill Site Type: Feeding Trail**

125 On 8 May 2015 we documented a kill site from wolf V009 of the Ash River pack  
126 on the west side of the west fork of Daley Bay. Wolf V009 had spent a minimum of 9.0  
127 hr at the kill site (the collar recorded locations at a 4 and then 5 hr fix interval). The kill  
128 site was 98.9 m from water and in a dense coniferous stand with a few deciduous trees  
129 scattered throughout. Close by were many feeding trails leading inland and the beavers  
130 appeared to be actively cutting >50 m from water in several places. The kill site was  
131 inconspicuous as it was in a coniferous stand and thus disturbances from the kill were not  
132 easily identified. However, after searching extensively we found the kill site. The only  
133 remains were long bones with some flesh still attached. We found a few fresh wolf scats  
134 and some more bone fragments in the vicinity. Based on the number of scats and  
135 scattered remains as well as several sets of wolf tracks on the shoreline, we do not think  
136 wolf V009 was alone at this kill site.

137 Determining what occurred at this kill site was challenging, and it is puzzling how  
138 far from water this kill occurred. With so many feeding trails nearby, it seems likely that  
139 the beaver was foraging far from water when either the beaver detected wolves, or was  
140 attacked by wolves. However, there were no fresh cuttings within 40 m of the kill site.  
141 With multiple wolves present, the beaver likely had no way to reach the water. Perhaps  
142 the beaver tried to escape by running the opposite direction of the wolves which would  
143 explain why the kill occurred even farther inland than the farthest freshly cut tree. We did  
144 not find any evidence of drag marks that would suggest the beaver was dragged to the kill  
145 site. Moreover, we thoroughly searched the entire area and ruled out the possibility that  
146 the beaver was killed closer to water and then consumed where we found the remains.

#### 147 **Beaver Kill Site #9 (UTM 507859, 5364552)**

##### 148 **Kill Site Type: Below Dam**

149 On 12 May 2015, we documented a kill site near a group of 3 ponds about 1.5 km  
150 west of Blind Ash Bay, Lake Kabetogama. Wolf V009 of the Ash River Pack was here  
151 for a minimum of 6 hr. Unlike at all the other kill sites, we found no remains at this kill.  
152 Between when the kill would have occurred and when we were able to examine the  
153 cluster we received heavy rain which certainly could have washed tufts of fur or little  
154 pieces of stomach contents to the bottom of the depressed vegetation. Similarly, it is not  
155 unreasonable that the wolves consumed the entire carcass. For example, at a few kill sites  
156 we have not found any hair and at others only hair. Therefore it is likely that either all the  
157 remains were consumed, or the few that were not were washed away and not found.

158 However, several other lines of evidence suggest this was in fact a kill site. We  
159 found 3 viscous, tar-like scats indicative of a recent kill (Peterson and Ciucci 2003) that

160 all contained beaver hair. Moreover, at the GPS-locations we found a large area that had  
161 been trampled and all the vegetation depressed. This area was significantly larger than a  
162 wolf bed and was of the same size and shape as that of Beaver Kill Sites #2 and #13. We  
163 have examined >150 clusters and have not documented depressed vegetation such as this  
164 except at other beaver kill sites.

165 The location of this kill fits the pattern seen at other below dam kill sites. The  
166 matted vegetation suggests the beaver was in the small channel below the dam when it  
167 was attacked and then consumed nearby on shore. Wolf V009 appeared to have been with  
168 at least 1 other wolf at this kill site based on the number of beds present. Over the course  
169 of the summer, wolf V009 visited this area frequently and we determined that in July  
170 2015 wolf V009 killed a deer fawn and a great blue heron (*Ardea herodias*) chick <50 m  
171 from the location of this kill site. Similarly, wolf V009 killed a beaver (Beaver Kill Site  
172 #14) at the same pond as this kill site in October.

### 173 **Beaver Kill Site #10 (UTM 508927, 5361953)**

#### 174 **Kill Site Type: Small Waterway**

175 On 15 May 2015, we documented a kill site in the middle of the Ash River  
176 territory near a small creek that was flowing into an active beaver pond. Wolf V009  
177 appeared to be alone when attacking and killing this beaver. Based on drag marks from  
178 the creek to the kill site, it appears that wolf V009 attacked the beaver in the water and  
179 then consumed it 8.2 m away. Moreover, there was a fresh wolf track in the mud of the  
180 creek right where it appeared the beaver was attacked. The track was pointed the  
181 direction we would have expected if the wolf attacked the beaver and tried to drag it out



182 of the creek by backing up. The creek was narrow and shallow with most of the creek  
183 <0.5 m deep.

184 We found a few tufts of beaver fur at the kill site and on vegetation between the  
185 kill site and the creek presumably from when the wolf was dragging the beaver to the kill  
186 site. Nearby we found a wolf scat. Wolf V009 was at the kill site for a minimum of 4 hr  
187 (4-hr fix interval). As we searched the area we identified a rudimentary dam about 25 m  
188 upstream from the kill site. Close by were several freshly cut aspens that were likely  
189 being used to construct a dam and thus stop the flow of the creek. This dam was  
190 approximately 250 m upstream from an active beaver pond that the creek flowed into.  
191 We concluded that the beaver was likely a dispersing beaver that was trying to dam up  
192 the stream and create a pond when it was killed.

### 193 **Beaver Kill Site #11 (UTM 521515, 5359451)**

#### 194 **Kill Site Type: Small Waterway**

195 On 2 June 2015, we documented a kill from wolf V027 from the Moose River  
196 Pack. The kill occurred about 150 m south of Wiyapka Lake next to a small waterway  
197 that went through an alder swamp. The small waterway flowed into Wiyapka Lake from  
198 a beaver pond complex 300–400 m upstream. The kill site was easily identified by the  
199 trampled vegetation, presence of stomach contents, and a large amount of beaver hair.  
200 There was a foul odor from the remains (this is the only kill site where that was the  
201 case).

202 We do not know how long wolf V027 was in the area because there was only 1  
203 location taken within 200 m of the kill site. However, the maximum time spent at the kill  
204 site was 8 hr (4-hr fix interval). Technically, this kill site did not occur at a cluster as

205 there were no other locations prior to, or after this location within 200 m. We only visited  
206 this location because it was between 2 clusters we had to investigate. The kill site was  
207 within 5 m of the GPS location. It is worth noting that the wolf spent at least 12 hr only  
208 225-250 m west of the kill site prior to being located at the kill site.

209         Based on the depressed vegetation and proximity of the kill to water, it appeared  
210 the wolf attacked the beaver in the small waterway and then consumed it 1 m away on  
211 land. There were no fresh cuttings or beaver trails nearby to suggest the beaver was on  
212 land when caught. The small channel that the beaver was pulled from was about 2–3 m  
213 wide and >1 m deep.

#### 214 **Beaver Kill Site #12 (UTM 515479, 5346542)**

##### 215 **Kill Site Type: Forest Interior**

216         On 6 June 2015, we documented a kill from V026 of the Sheep Ranch Pack. Wolf  
217 V026 was present at the kill site for at least 12 hr (12-hr fix interval). The kill site was  
218 approximately 1 km southwest of Corner Lake in a dense aspen stand 222.1 m away from  
219 the nearest body of water. We did not find any evidence of fresh cuttings or any other  
220 beaver activity. Therefore, we presumed this was a dispersing beaver that was trying to  
221 move from 1 pond complex to the next by crossing through the forest. Wolf V026 had  
222 ventured 1 km south of the Sheep Ranch Pack territory on the same day and likely  
223 encountered the beaver opportunistically.

224         At the kill site we found evidence of a struggle as a downed log had been torn  
225 apart on 1 end with claw and/or tooth marks present in the wood. A small sapling had  
226 also been broken off about 1 m above the ground, and we found beaver fur on the sapling  
227 where it had been broken off. More beaver fur was found in the vegetation nearby, and at

228 the kill site. We also found a wolf scat at the kill site. About 15 m away from the kill site  
229 we found some bone fragments that were in the same spot as the second GPS location  
230 from wolf V026. It appeared that wolf V026 was alone at the kill site as all beaver  
231 remains that were identified were found at the GPS locations from that wolf.

### 232 **Beaver Kill Site #13 (UTM 511374, 5363576)**

#### 233 **Kill Site Type: Below Dam**

234 On 10 October 2015, we documented a kill site 75 m west of the Sullivan Bay  
235 trailhead below a dam near an active pond. The kill occurred below the 2<sup>nd</sup> active dam  
236 downstream of the pond instead of the primary dam that was damming the main pond.  
237 The 2 dams were about 30 m apart, and a well-used beaver trail crossed over the primary  
238 dam, across a small stretch of land and into the small pond created by the 2<sup>nd</sup> dam. There  
239 was also a trail that crossed over the 2<sup>nd</sup> dam to a small shallow channel below the dam.  
240 The kill site was about 3 m from the trail and 10 m below the second dam (distance to the  
241 small channel was 4 m). We speculate that the beaver had crossed over the second dam  
242 and had almost reached the small channel when a wolf, concealed in the vegetation,  
243 attacked the beaver and consumed it close by.

244 The kill site was obvious due to the large area of trampled vegetation but we  
245 found very little of the carcass at this location (a tuft of beaver fur and stomach contents).  
246 Wolf V009 of the Ash River pack was present in the vicinity of the kill site for at least 24  
247 hr (6-hr fix interval). However, between 6 and 12 hr the wolf moved 140 m away where  
248 he bedded down for at least another 18 hr on a high rocky ridge. We found 3 fresh wolf  
249 scats on this ridge – all were associated with GPS-locations. Similarly, we found the

250 beaver skull close by 1 of the GPS-locations. Based on this V009 was likely alone at the  
251 kill site.

252 **Beaver Kill Site #14 (UTM 507558, 5364569)**

253 **Kill Site Type: Feeding Trail**

254 On 13 October 2015, we opportunistically documented a kill site on the southwest  
255 side of the beaver pond where Beaver Kill Site #9 was found. Although we found this kill  
256 site opportunistically, we think that wolf V009 killed this beaver because GPS-collar data  
257 (6-hr fix interval) shows that he was 170 m from the kill site about 2 hr after we found it.  
258 We do not think it is coincidence that the wolf was within the vicinity of this kill site just  
259 after we documented a freshly-killed beaver.

260 The kill occurred on an active feeding trail where beavers had been cutting and  
261 transporting aspen to the pond. Wet blood across the ground and vegetation suggested the  
262 kill site was < 12 hr old. Rain throughout the previous day would have washed away the  
263 blood if the kill had occurred before or during this time.

264 At the kill site we found intact segments of the intestinal tract and fresh pieces of  
265 muscle tissue that had not been consumed. We probably scared the wolf away from the  
266 carcass as we did not find these remains at any other kill site. We also found a piece of  
267 leg bone still attached in the socket to a piece of the pelvis. Some tufts of beaver fur were  
268 spread around the kill site and stomach contents had been strewn about. The wolf  
269 appeared to be alone as all beaver remains found were at the kill site. We searched the  
270 area extensively and did not find any beaver remains or beds in the vicinity of the kill.  
271 We do not know how long Wolf V009 remained or would have remained at the kill site  
272 had we not scared it away.

273           On the shore of the pond we found a set of fresh wolf tracks in the mud. The  
274 tracks were on the west side of the feeding trail and headed east along the pond shore. We  
275 did not find any tracks in the stretches of exposed muddy shoreline on the east side of the  
276 feeding trail leading us to believe the wolf stopped traveling on the shore when it reached  
277 the feeding trail. This seems likely and is consistent with how wolf V027 hunted and  
278 killed a beaver on a feeding trail at Beaver Kill Site #7. We do not know whether this  
279 wolf was waiting until the beaver went on shore, or was running the shoreline when it  
280 caught the fresh scent of a beaver, turned onto the feeding trail, and found the beaver  
281 inland. Whatever the case, the beaver appeared to be cutting a recently-felled aspen  
282 when, based on the drag marks and blood on the vegetation, it was attacked and then  
283 consumed about 10 m away. The kill site was 15.5 m from the pond.

#### 284 **Beaver Kill Site #15 (UTM 505693, 5360680)**

##### 285 **Kill Site Type: Feeding Canal**

286           On 13 October 2015, we documented a kill site on the south shore of the east fork  
287 of Daley Bay, Lake Kabetogama. Wolf V009 of the Ash River Pack was present at this  
288 kill site for at least 6 hr (6-hr fix interval) and appeared to be alone. The dead beaver was  
289 from the same lodge as the beaver found at Beaver Kill Site #16.

290           This kill site was 4.9 m from an active feeding canal that was about 30–35 m  
291 long, 1 m wide, and about 1 m deep. Depressed vegetation from the shore of the canal to  
292 the consumption site suggests the wolf attacked the beaver in the water and then  
293 consumed it away from the canal. We only found a few small tufts of beaver fur, stomach  
294 contents, a few bone fragments, and 2 castor glands. We did not find any fresh cuttings or  
295 other beaver activity at the kill site. Thus, there is no reason to believe the beaver was on

296 shore when attacked. The beaver was likely pulled out of the water about half way down  
297 the feeding canal. There was no evidence (depressed vegetation or tracks) on the  
298 shoreline to suggest the wolf attempted to pull the beaver out of the canal at any other  
299 spot.

300 Thus, we think the beaver was heading toward the feeding trail at the end of the  
301 feeding canal and wolf V009 was waiting in the tall grass on the canal edge. Wolf V009  
302 then attacked and killed the beaver. The depressed and trampled grass at the kill site  
303 made it easy to identify. However, very little of the beaver was left.

#### 304 **Beaver Kill Site #16 (UTM 505770, 5360683)**

##### 305 **Kill Site Type: Feeding Canal**

306 On 13 October 2015, we documented a kill site on the north shore of the east fork  
307 of Daley Bay. The kill occurred near Beaver Kill Site #15 and the beaver killed at this  
308 kill site (#16) belonged to the same lodge as the beaver at Beaver Kill Site #15. Wolf  
309 V009 of the Ash River pack spent at least 30 hr (6-hr fix interval) at this kill site. We  
310 believe multiple wolves were present because we found several scats, and consumption  
311 sites within 50 m of the kill site.

312 The beaver appeared to have been pulled out of a wide feeding canal, dragged on  
313 shore, and consumed 2.6 m from water. The canal was not a narrow, long canal like at  
314 Beaver Kill Site #15 but rather was short and funnel shaped as the mouth of the canal was  
315 quite wide but then narrowed to about 1 m when it met the shore. Given the shape of the  
316 canal and angle of the shoreline, the canal was likely >1 m in most places.

317 The beaver was attacked 3 m from the end of the canal. Wolf V009 or another  
318 wolf it was with were likely waiting on the canal edge and attacked the beaver as it was

319 heading for the feeding trail at the end of the canal. The beavers had been especially  
320 active at this feeding trail and had likely cut more than half of the trees that were <30 m  
321 from shore.

322 We left this kill site at dusk and howled to elicit a wolf response. Within seconds  
323 the entire Ash River Pack (4 adults, 2 pups) howled back to the northeast of the kill site.  
324 The 2 pups in the pack could be heard clearly, and we estimated that the wolves were no  
325 farther 300 m away.

326 Wolf V009 first arrived in the vicinity of the kill site on 11 October 2015 and the  
327 last location at the kill site was on 12 October 2015 at 9:30. We do not know then if it  
328 was simply coincidental that the entire pack was near this kill site at this time or if some  
329 pack members remained in the area for up to 48 hr following the kill.

### 330 **Beaver Kill Site #17 (UTM 509974, 5361135)**

#### 331 **Kill Site Type: Feeding Trail**

332 On 26 October 2015 we documented a kill site at a pond about 1 km due west of  
333 the Helipad Road. Wolf V009 of the Ash River Pack was present at this kill site for at  
334 least 12 hr (6-hr fix interval). The kill was hard to find as the few remains present were  
335 inconspicuous. We were only able to identify a few tufts of beaver fur, stomach contents  
336 and both castor glands. However, only the few small pieces of the stomach contents were  
337 present at the actual kill site.

338 The week preceding this kill site was generally cold, and the ground and leaf litter  
339 were frozen as a result. Thus, the evidence of a struggle or of the handling of the beaver  
340 that is usually apparent from disturbed leaf litter or vegetation was mostly missing.

341 Nonetheless, upon searching the area we found some small pieces of stomach contents in

342 a 'bread crumb' like trail back to the pond and were able to determine that the kill  
343 occurred 1 m off of a feeding trail and 5.1 m from the water. Some depressed vegetation  
344 was present at the kill site but it would not have been obvious without following the  
345 remains back to the location of the kill.

346 We determined that there were 2 wolves present at this kill based on the fact that  
347 we found 2 separate trails of beaver remains going in different directions from the kill  
348 site. It appeared as though 1 wolf dragged part of the beaver 20 m south –leaving a trail  
349 of stomach contents– to a consumption site. The other wolf dragged the rest of the beaver  
350 in an east-southeast direction about 25 m (leaving tufts of beaver fur caught in the  
351 vegetation) to a consumption site. We found 3 wolf scats in the vicinity of the kill. We  
352 did find a few wolf beds next to active beaver trails around this pond about 30–50 m from  
353 the kill site. However, we do not know whether the wolves waited for the beaver to come  
354 ashore or not.

### 355 **Beaver Kill Site #18 (UTM 507510, 5367693)**

#### 356 **Kill Site Type: At Dam**

357 On 26 October 2015, we documented a kill site where wolf V045 of the Shoepack  
358 Lake Pack killed a kit beaver approximately 200–300 m north-northeast of the Shoepack  
359 Beach Campsite, Lake Kabetogama. Wolf V045 was present at this kill site for 7.7 hr  
360 (20-min fix interval). The kill occurred on a small point that jutted out into a pond about  
361 1 m away from the beaver dam. Based on the GPS data, wolf V045 was present at the kill  
362 site on the small point for at least 1.3 hr and then moved 50 m away and bedded down for  
363 at least 6.3 hr. A scat was present at both the kill site and also where the wolf bedded  
364 down nearby. The scat at the kill site was full of beaver stomach contents but very little



365 beaver hair. The small size of the kit might have led to the wolf consuming a significant  
366 amount of the stomach contents which were then defecated. All beaver remains found  
367 were located on the point. Wolf V045 appeared to be alone at the kill site. The only  
368 remains identified were a small pile of stomach contents and 2 small incisors indicating  
369 this was a beaver kit.

370         The depressed vegetation on the point suggested the beaver was in the water when  
371 wolf V045 attacked it. The beaver was then killed and consumed 1 m from the water on  
372 the point. Based on the evidence, there are 3 different ways this kill could have occurred:  
373 1) the wolf waited on the point and a beaver swam right next to shore and the wolf  
374 grabbed it without going in the water, 2) the beaver was out in the pond a few meters  
375 from shore, the wolf waited until it was close enough and then leaped into the pond and  
376 caught it, or 3) the wolf was swimming in the water, caught the beaver, and then dragged  
377 it up onto the point.

### 378 **Beaver Kill Site #19 (UTM 508825, 5350058)**

#### 379 **Kill Site Type: Feeding Trail**

380         On 30 October 2015, we documented a kill site from the Sheep Ranch Pack at a  
381 pond approximately 1 km north of the northwest corner of the Sheep Ranch. Wolf V026  
382 was present at the kill site but we think that the wolf was with several other wolves based  
383 on the number of beds at the kill site. The beaver pond had several long narrow channels  
384 to access feeding trails on the shore. The kill occurred on a feeding trail only 8.6 m from  
385 the water. Based on the depressed vegetation, the beaver was probably on land when  
386 attacked and killed based on the depressed vegetation.

387 Most of the remains present at the kill site were tufts of beaver fur on the ground.  
388 However, beaver fur was also caught in briars and other small shrubs. The lack of  
389 remains was likely due to the fact that multiple wolves were present. We found 3 wolf  
390 scats nearby. It appeared the beaver was coming from the feeding canal to the feeding  
391 trail. Once it was on shore, the wolves attacked, and consumed the beaver.

392 Wolf V026 was present at the kill site for at least 7.7 hr (20-min fix interval).  
393 Based on the GPS data it appeared as though the wolf spent 1–1.7 hr near the pond close  
394 to the kill. If we assume that the kill occurred when the wolf was at the exact location of  
395 the kill site then we can say that the wolf was at this beaver pond 40 min prior to making  
396 or helping make the kill. However, we do not know when the kill occurred and since  
397 there were other wolves present we do not know if wolf V026 or other pack members  
398 made the kill. Wolf V026 then moved 30 m east of the kill site and bedded down for  
399 several hr on a small ridge. Other wolf beds were present on the ridge and we think that  
400 several wolves bedded down in this area after the kill.

#### 401 **Beaver Kill Site #20 (UTM 515020, 5366546)**

#### 402 **Kill Site Type: Feeding Trail**

403 On 4 November 2015, we documented a kill site on the north shore of Kohler  
404 Bay, Lake Kabetogama. Wolf V045 of the Shoepack Lake Pack was present in the  
405 vicinity of the kill site for at least 25.7 hr (20-min fix interval). The kill site was on a  
406 feeding trail 23.1 m from the water. The beavers had been very active in this area and  
407 near the kill site there were several freshly-cut aspens.

408 We found this kill site easily as only 85% of the beaver had been consumed. We  
409 found the skull and lower mandible as well as the entire vertebral column with the bones

410 of the back legs still attached. Wolf V045 was likely alone at this kill site as all beaver  
411 remains were at GPS-collar locations. Wolf V045 was initially at the kill site for at least  
412 1.3 hr before it left for a few hours then returned and stayed for at least 24.3 hr more. The  
413 beaver was an adult based on skull size and could have weighed 18–22 kg. Therefore, it  
414 would have been a significant amount of food for a single wolf, which likely explains  
415 why the wolf was in the vicinity of the kill site for so long.

416         We know when this wolf arrived at the kill site but we do not know when it made  
417 the kill. All of the initial locations were <10 m apart but it is unknown whether that was  
418 the result of the wolf waiting at the kill site. We would expect the same cluster pattern  
419 from a wolf that waited and then made a kill, and from a wolf that immediately made a  
420 kill and consumed the beaver at that location.

#### 421 **Beaver Kill Site #21 (UTM 507733, 5364461)**

##### 422 **Kill Site Type: Feeding Trail**

423         On 4 November 2015, we documented a kill site at the same pond complex as  
424 Beaver Kill Site #9 and #14. Wolf V009 of the Ash River Pack was present at this kill  
425 site for at least 6 hr (6-hr fix interval). Throughout the ice-free season Wolf V009  
426 frequently visited and spent a significant amount of time around this pond complex  
427 (V009 killed 3 beavers, 1 fawn and 1 great blue heron chick in this area).

428         Wolf V009 was not alone at this kill site. We found bone fragments in a few areas  
429 about 20 m from the kill site in the woods which suggests that other wolves were present.  
430 We also found several wolf beds near the kill site. One wolf scat was found  
431 approximately 30 m from the kill site.

432           The kill occurred on a feeding trail 12.8 m from the water. The beavers had been  
433 clearing many large aspens in the area near the kill site. We are not sure how the wolf or  
434 wolves hunted this beaver, and GPS data do not provide clarification. At the kill site we  
435 found stomach contents and tufts of beaver fur strewn across the vegetation. Some small  
436 bones and bone fragments were found at the kill site as well.

437 **Beaver Kill Site #22 (UTM 534251, 5363143)**

438 **Kill Site Type: Feeding Trail**

439           On 6 November 2015, we documented a kill site on the south shore of a beaver  
440 pond just north of O'Leary Lake. Wolf V033 of the Moose River Pack was present at this  
441 kill site for at least 5.3 hr (20-min fix interval). We found the kill site 13.4 m from the  
442 water on an active feeding trail. The kill was relatively fresh and we found wet blood on  
443 the leaf litter and vegetation at the kill site. The beaver appeared to have been attacked  
444 about 8 m from the pond but then dragged farther inland to where it was consumed.

445           We think that the entire Moose River Pack (8 adults, 3–4 pups) was present at this  
446 kill site. In the fall this pack appeared to be moving around its territory nomadically and  
447 almost every cluster we visited had several beds and scats present. Moreover, for most of  
448 the fall we had 2 GPS-collared wolves in this pack and they were almost always in the  
449 same location at the same time. We visited the clusters prior to, and after this kill and  
450 found numerous wolf beds and wolf scats at both.

451           At the kill site we found strewn stomach contents, a few tufts of beaver fur, and  
452 some small bone fragments. We searched the area and found several wolf beds 25-75 m  
453 from the kill site with beaver fur, beaver blood, stomach contents or bone fragments in  
454 them. Similarly we found the skull and lower mandible 180 m from the kill site in an area

455 where a few wolves appeared to have bedded down. Whether the wolves were searching  
456 for or waiting for this beaver is unknown. Wolf V033 was at the kill site for several hr  
457 but we do not know if the wolves had made the kill yet or if they were waiting to make  
458 the kill. In the vicinity of the kill site we documented several wolf beds next to beaver  
459 feeding trails but we cannot say whether this was from wolves waiting for a beaver to  
460 come ashore, or simply the result of them bedding down after making the kill.
